# Supplementary material for: Interfacial Passivation Engineering of Perovskite Solar Cells with Fill Factor over 82% and Outstanding Operational Stability on n-i-p Architecture
Source: PubMed Central journal article supplement (PMC8593894; doi:10.1021/acsenergylett.1c01811), 2021-10-15
Supplement: nz1c01811_si_001.pdf [file nz1c01811_si_001.pdf]

## **Interfacial passivation engineering of perovskite solar cells with fill factor over 82% and outstanding operational stability on n-i-p architecture**

Bowen Yang,<sup>a,b†\*</sup> Jiajia Suo,<sup>a,b†</sup> Francesco Di Giacomo,<sup>c\*</sup> Selina Olthof,<sup>d</sup> Dmitry Bogachuk,<sup>e,f</sup> YeonJu Kim,<sup>a</sup> Xiaoxiao Sun,<sup>g</sup> Lukas Wagner,<sup>e,f</sup> Fan Fu,<sup>g</sup> Shaik M. Zakeeruddin,<sup>h</sup> Andreas Hinsch,<sup>e</sup> Michael Grätzel,<sup>h</sup> Aldo Di Carlo,<sup>c,i</sup> Anders Hagfeldt<sup>a,b\*</sup>

<sup>a</sup>Laboratory of Photomolecular Science, Institute of Chemical Sciences and Engineering, School of Basic Sciences, Ecole Polytechnique Fédérale de Lausanne, CH-1015 Lausanne, Switzerland

<sup>b</sup>Department of Chemistry - Ångström Laboratory, Uppsala University, Box 523, SE-75120 Uppsala, Sweden

<sup>c</sup>Centre for Hybrid and Organic Solar Energy (CHOSE), Department of Electronic Engineering, University of Rome Tor Vergata, Rome 00133, Italy

<sup>d</sup>University of Cologne, Institute for Physical Chemistry, Greinstrasse 4-6, 50939 Cologne, Germany

<sup>e</sup>Fraunhofer Institute for Solar Energy Systems ISE, Heidenhofstr. 2, 79110 Freiburg, Germany

<sup>f</sup>Department of Sustainable Systems Engineering (INATECH), Albert-Ludwigs-Universität Freiburg, Emmy-Noether-str. 2, 79110 Freiburg, Germany

<sup>g</sup>Laboratory for Thin Films and Photovoltaics, Empa–Swiss Federal Laboratories for Materials Science and Technology, 8600 Duebendorf, Switzerland

<sup>h</sup>Laboratory of Photonics and Interfaces, Institute of Chemical Sciences and Engineering, School of Basic Sciences, Ecole Polytechnique Fédérale de Lausanne, CH-1015 Lausanne, Switzerland

<sup>i</sup>Institute for Structure of the Matter, National Research Council (ISM-CNR), Rome 00133, Italy

†Both authors contributed equally to this work.

\*Corresponding authors

B.Y.: bowen.yang@kemi.uu.se, F. D. G.: [francesco.di.giacomo@uniroma2.it](mailto:francesco.di.giacomo@uniroma2.it), A. H.: anders.hagfeldt@uu.se

## **Experimental Section**

### **Synthesis of CEAI**

2-Cyclohexylethylamine (0.63 g, 5.0 mmol) (TCI) was dissolved in 20 mL MeOH at 0 °C, hydroiodic acid solution (1 mL) (Sigma-Aldrich, 57% in water) was added dropwise. After the mixture was stirred for 1 h, the solution was removed to room temperature and stirred for another 2 h. After solvent evaporation, the resulted solid residue was washed with diethyl ether three times, affording white solid product (1.10 g, 87 % yield). <sup>1</sup>H NMR (400 MHz, DMSO) δ 7.56 (s, 3H), 2.87 – 2.72 (m, 2H), 1.73 – 1.56 (m, 5H), 1.50 – 1.35 (m, 2H), 1.35 – 1.05 (m, 4H), 0.96 – 0.78 (m, 2H); <sup>13</sup>C NMR (101 MHz, DMSO) δ 36.87, 34.45, 34.19, 32.38, 25.89, 25.56.

### **Substrate**

Fluorine doped tin oxide (FTO) substrates (NSG-10) were chemically etched by zinc powder and 4 M HCl solution and sonicated in 2% Hellmanex water solution for 30 min, acetone for 15 min and ethanol for 15 min, respectively. Then, all substrates were further cleaned by UV-Ozone for 15 min. Then, a compact TiO<sub>2</sub> layer was deposited on cleaned FTO substrates via spray pyrolysis deposition from a precursor solution of titanium diisopropoxide bis(acetylacetonate) (Sigma-Aldrich) in anhydrous ethanol (Acros), with oxygen as carrier gas. Substrates were heated at 450 °C and kept at this temperature for 15 min before and 30 min after the spray of the precursor solution, then left to cool down to room temperature. Mesoporous TiO<sub>2</sub> layer was spin-coated at 4000 rpm for 20 s, with the acceleration rate of 2000 rpm/s, using a 30 nm TiO<sub>2</sub> paste (Dyesol 30 NR-D) diluted in ethanol with 1:6 volume ratio. After the spin-coating, the substrates were dried at 80 °C for 10 min and then sintered at 450 °C for 30 min under dry air flow.

### **Perovskite layer**

The perovskite precursor solution was prepared by dissolving a mixture of cesium iodide (0.07 mmol, TCI Co. Ltd.), methylammonium bromide (0.14 mmol, Dyenamo), formamidinium iodide (1.19 mmol, Dyenamo), lead iodide (1.45 mmol, Alfa Co. Ltd.) in 1 mL mixture of DMF and DMSO (DMF:DMSO=4:1 v/v, Acros). The perovskite solution was spin-coated through two-step program (1000 rpm for 10 s and 6000 rpm for 20 s) with pouring chlorobenzene as an anti-solvent 5s before the end of the second step. Then the substrates were annealed at 100 °C for 1 h in dry air. The CEAI was dissolved in IPA and the solution was spin-coated at 4000 rpm for 20s on the as-prepared perovskite films and dried on a hot plate at 100 °C for 10 min.

### **Hole transporting layer and Au top contact**

The substrates were cooled down to room temperature after annealing the perovskite. A spirofluorene-linked methoxy triphenylamines (spiro-MeOTAD, Merck) solution was deposited by spin coating at 4000 rpm for 20 s, as hole-transporting material. 90 mg spiro-MeOTAD was dissolved in 1 ml chlorobenzene, doped by 20.6  $\mu\text{L}$  bis(trifluoromethylsulfonyl)imide lithium salt solution (520 mg/mL LiTFSI in acetonitrile), and 35.5  $\mu\text{L}$  4-*tert*-butylpyridine (tBP, Sigma-Aldrich). Finally, 80 nm of Au top electrode was deposited through thermal evaporator under high vacuum with an active area of 0.16  $\text{cm}^2$ .

### **Characterization**

The solar cell devices were measured using a 300 W Xenon light source (Oriel). The spectral mismatch between AM 1.5 G and the solar simulator was calibrated by a Schott K113 Tempax filter (Prazosopms Gas & Optik GmbH). The light intensity was calibrated with a silicon photodiode with an IR-cutoff filter (KG2, Schott). Current-voltage characteristics were applied by an external voltage bias while measuring the corresponding current with Keithley 2400 under ambient air condition. The voltage scan rate was 50 mV/s. The devices were covered with a black metal mask with an active area of 0.16  $\text{cm}^2$ . Incident photon to current efficiency (IPCE) was carried by a commercial apparatus (Aequeo-Ariadne, Cicci Research s.r.l.). The top-view and cross-section morphologies of the samples was characterized using a high-resolution scanning electron microscope (Zeiss Merlin) with an in-lens secondary electron detector. The X-ray diffraction patterns were recorded with PANalytical Empyrean system with a PIXcel-1D detector, Bragg-Brentano beam optics and parallel beam optics. Light source is from copper  $\text{K}\alpha$  beam filtered with nickel  $\beta$  filter. Diffraction spectra were characterized between 2-theta of  $10^\circ$  and  $70^\circ$  at a scan rate of  $1^\circ$  per minute with the step width of  $0.02^\circ$ . Steady state photoluminescence (PL) spectra were obtained with an Andor Kymera 193i spectrometer equipped with a silicon CCD camera (iDus DU240A-OE). Excitation was provided by a CW laser (Obis, 422 nm, 1 mW, beam diameter at  $1/e^2$   $0.9\pm 0.1$  mm) for PL.  $^1\text{H}$  NMR and  $^{13}\text{C}$  NMR measurements were performed on Bruker AvanceIII-400 MHz NMR spectrometer. The operational stability of the devices was measured under a white light-emitting diode lamp with biologic MPG2 potentiostat under  $\text{N}_2$  gas flow at maximum power point tracking (MPPT). GIWAXS were measured on a Bruker D8 Discover Plus instrument equipped with a rotating anode and a Dectris Eiger2 500K detector. The primary beam path was collimated by a 1.0 mm micro-mask (after a focussing Göbel mirror), followed by a 0.5 mm micromask, followed by a 0.3 mm double-pinhole collimator. The detector was placed at 178 mm from the sample and 2D images were acquired for 300 seconds at  $2^\circ$  Theta (incidence

angle). 2D images were integrated using EVA. Photoelectron spectroscopy measurements were performed in a custom built ultra-high vacuum system. For UPS, a monochromatic He excitation source (VUV5k Scienta) was used with a photon energy of 21.22 eV. The samples were biased at -8 V and a pass energy of 2 eV was used. For XPS measurements the excitation energy was 1253.6 eV, generated by a non-monochromatic Mg  $K\alpha$  source (VG). The pass energy was 10 eV and the samples were grounded during the measurement. For UPS and XPS the kinetic energy of the generated photoelectrons were measured using a hemispherical energy analyzer (Phoibos 100, Specs). For IPES, a low energy electron gun (ELG-1, Kimball) was employed to create electrons with kinetic energies ranging from 5 to 16 eV while the generated photons were detected using a bandpass photon detector (SrF<sub>2</sub>/ NaCl bandpass, IPES 2000, Omnivac); the sample current was set to 2  $\mu$ A. The AFM characterization were carried out using an AFM microscope (Bruker ICON3) in air. A silicon nitride tip (scanasyst-air) with a radius of 10 nm was used as the probe. The cantilevers' spring constant and resonant frequency are 0.4 N/m and 70 kHz, respectively. Electroluminescence measurement were carried out with the Arkeo platform (Cicci Research), using a FDS1010 photodiode. The same tool was used to measure the EL spectrum and to carry out the transient photovoltage measurement. The 4-wire measurement were carried out with a Keithely 2420 and a customized LabView application.

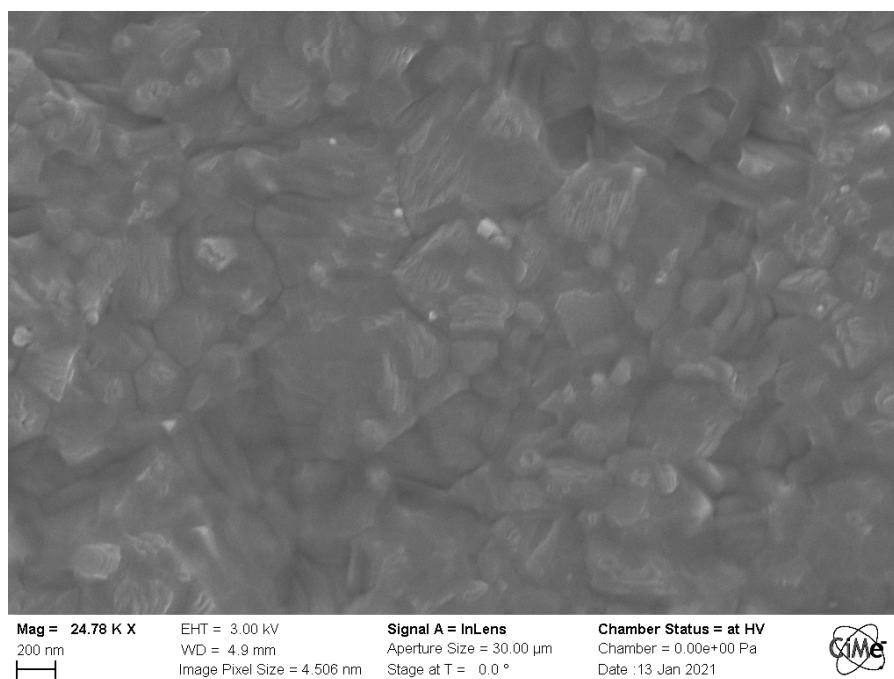

**Figure S1.** Top-view SEM image of PEAI-treated film.

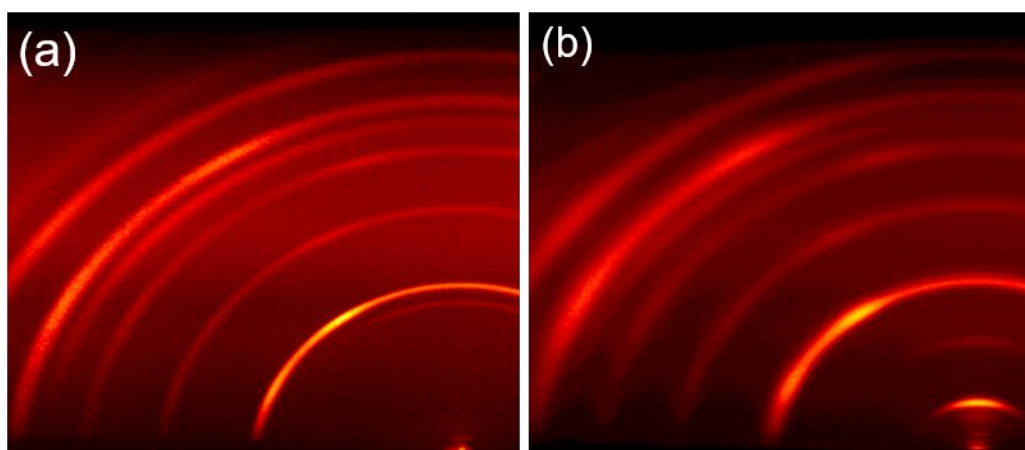

**Figure S2.** GIWAXS images of the (a) pristine perovskite and (b) CEAI-treatment film.

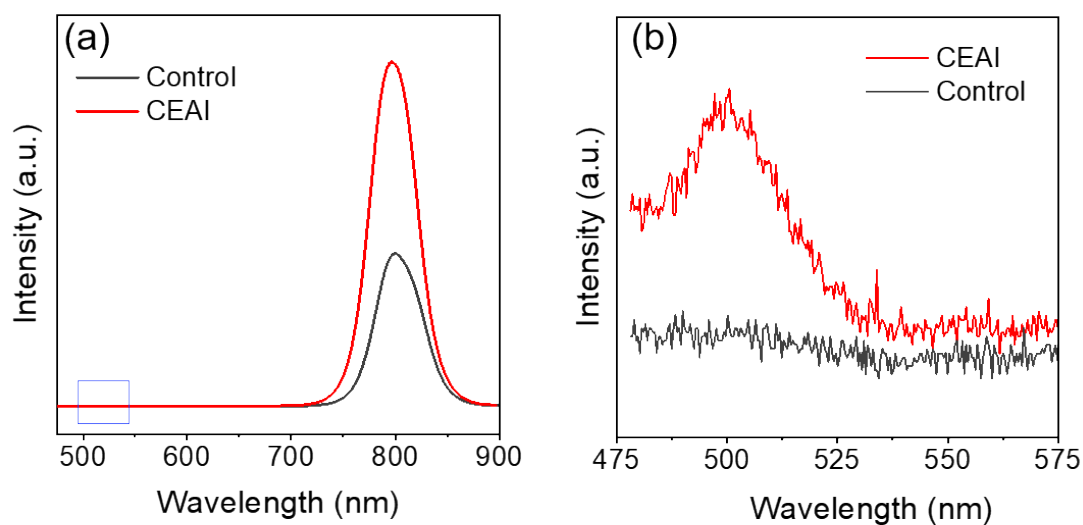

**Figure S3.** Steady-state PL of perovskite film with and without CEAI treatment.

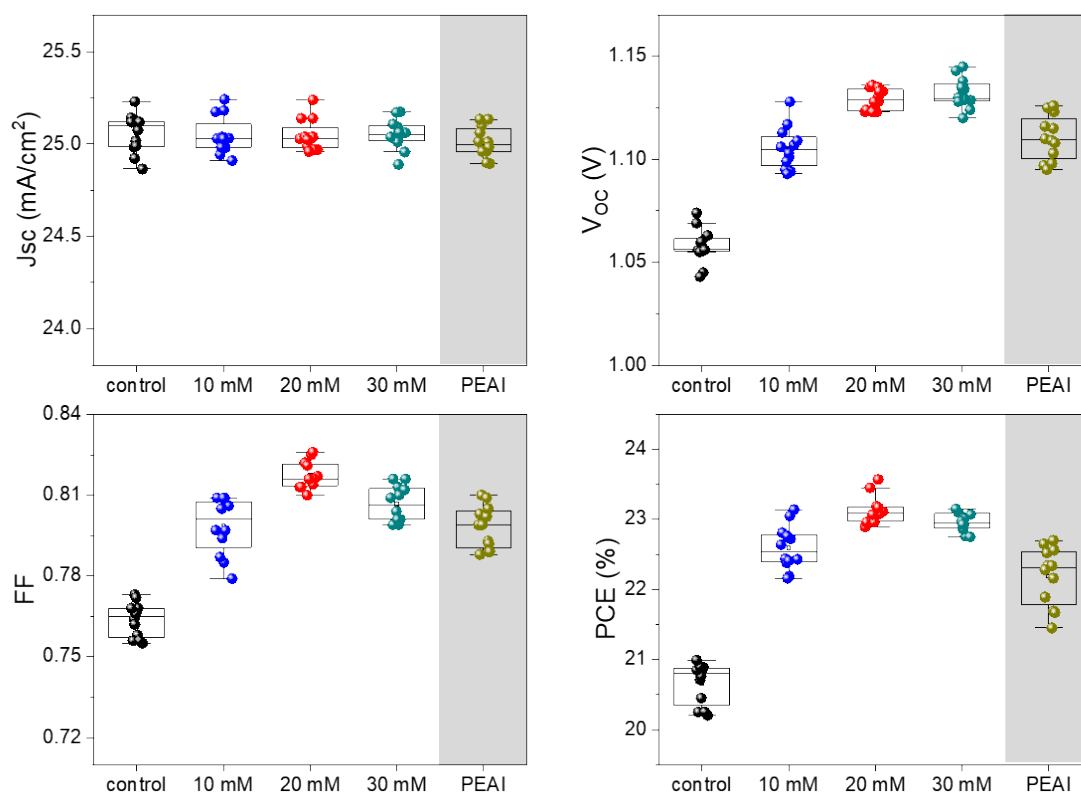

**Figure S4.** Statistical box charts for the photovoltaic parameters of (a)  $J_{sc}$ , (b)  $V_{oc}$ , (c) FF, and (d) PCE of the 12 devices each condition without and with CEAI treatment of different concentrations (10 mM, 20 mM and 30 mM), PEAI (20 mM) treatment.

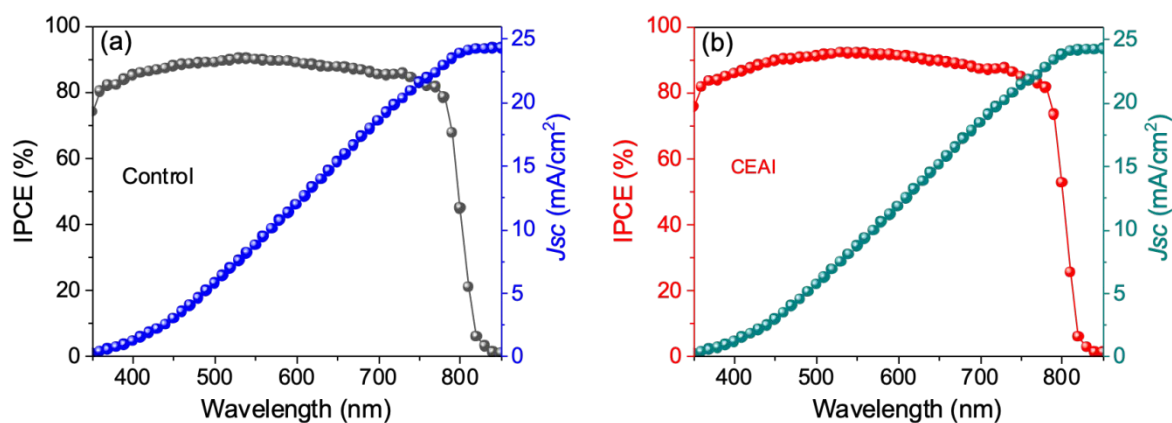

**Figure S5.** IPCE and integrated photocurrent density of devices with and without CEAI treatment.

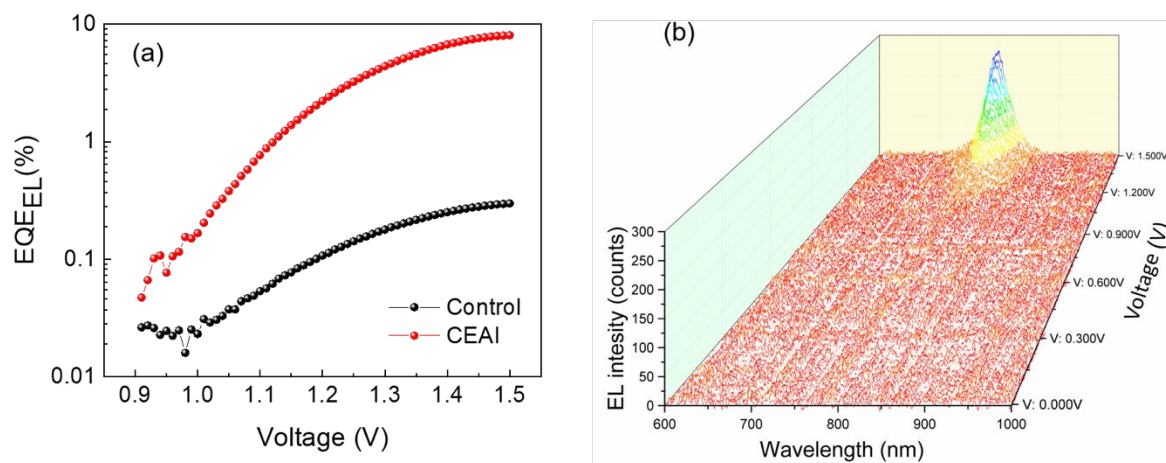

**Figure S6.** (a) Comparison of the electroluminescence quantum efficiency for a CEAI-treated cell compared to a control cell. (b) EL spectrum of the CEAI treated device at different voltages.

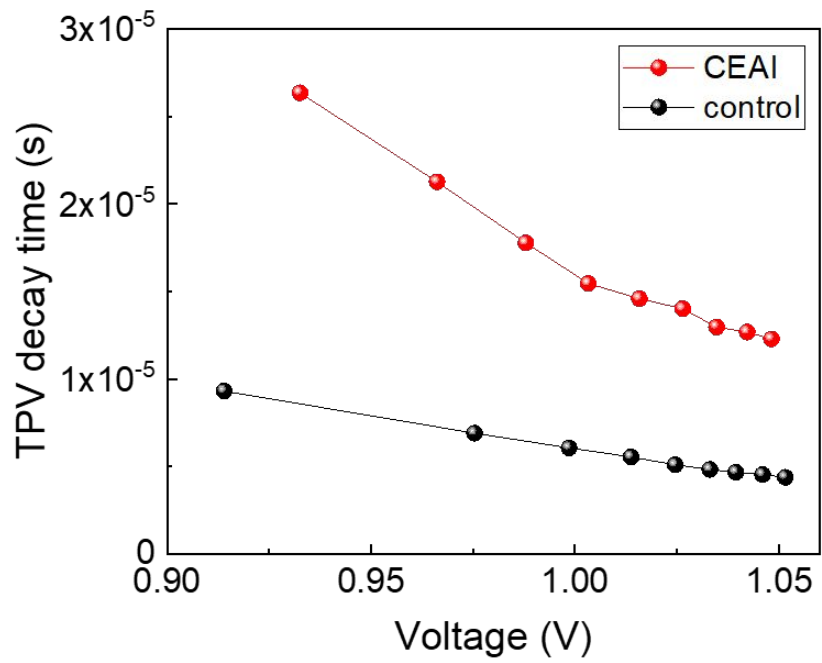

**Figure S7.** Comparison of the decay time of transient photovoltage measurement for a CEAI-treated cell compared to a control cell.



## Supplementary Note 1

The theoretical FF in the absence of charge-transport losses ( $FF_0$ ) was calculated via the analytical expression proposed by Green:<sup>[1]</sup>

$$FF_0 = \frac{v_{oc} - \ln(v_{oc} + 0.72)}{v_{oc} + 1} \quad \text{Eq. 1}$$

where  $v_{oc} = \frac{qV_{oc}}{nk_B T}$ ,  $q$  denotes elementary charge,  $V_{oc}$  – open-circuit voltage,  $n$  – ideality factor,  $k_B$  – Boltzmann constant and  $T$  – temperature. This empirical approximation has regularly proven to correlate well with the experimentally obtained values for silicon solar cells.<sup>[2]</sup>

From the obtained light-intensity-dependent measurement of  $V_{OC}$  and extrapolated  $J_{SC}$  values, pairs of  $J_{SC}$ - $V_{OC}$  at different light intensities have been obtained. Since the measurement is conducted under the open-circuit condition, no transport losses are present in this case because no current is drawn from the cell.

Pseudo current density ( $pJ$ ) is obtained by:

$$pJ(I) = J_{SC@1Sun} - J_{SC}(I)$$

where each specific light intensity value ( $I$ ) corresponds to a certain  $J_{SC}$ - $V_{OC}$  pair. For a more accurate determination of the pseudo-maximum-power-point (and thus pFF), measured  $V_{OC}$ - $J_{SC}$  pairs were fitted to the  $V_{OC}$  expression shown below, based on the measured ideality factor and  $J_{sc@1Sun}$ .

$$V_{oc}(I) = \frac{nk_B T}{q} \ln \left( \frac{J_{ph}(I)}{J_0(I)} + 1 \right)$$

where  $J_{ph}$  is the photogeneration current (approximated by  $J_{SC}$ ) and  $J_0$  is the dark saturation current.

Plotting the subtracted  $J_{SC}$  at each light intensity from the  $J_{SC}$  at one sun illumination (i.e. plotting  $pJ$ ) against  $V_{OC}$  gives pseudo  $J$ - $V$  curve, which is essentially a light  $J$ - $V$  curve without series resistance. However, the non-radiative recombination processes are still present in the cell, even though no current is drawn from it. Thus, pFF obtained from the  $pJV$  curve represents a case where non-radiative recombination losses of the FF are still present, but transport losses (e.g. transport of carriers through perovskite bulk, their extraction and transport through the

charge-selective layers, losses at interfaces) are not. This gives a unique opportunity to disentangle between the contributions of transport and non-radiative recombination losses in a cell.

## Supplementary Note 2

To get the FF value in the absence of transport and non-radiative losses –  $FF_{\max}$ , Shockley-Queisser approximation can be used, which considers that the only loss of the photo-excited charge carriers happens due to radiative recombination process:

$$J(V) = J_{ph} - J_0 e^{\frac{qV}{nk_B T}}$$

Since  $J_{ph}$  and  $J_0$  depend on the semiconductor absorption spectrum, its bandgap energy must be known to calculate  $FF_{\max}$ . Based on the PL spectra shown in **Figure S3**, the band gap of the studied perovskite was determined to be 1.56 eV. Thus, a  $J$ - $V$  curve in the case of Shockley-Queisser limit has been calculated via publicly available python-based script (<https://github.com/marcus-cmc/Shockley-Queisser-limit>) and plotted in **Figure 4d** (yellow  $J$ - $V$  curve), having a  $FF_{\max}$  of 90.3% for a perovskite absorber investigated in this study.

**Table S1.** Champion photovoltaic parameters of 1 cm<sup>2</sup> PSCs with CEAI treatment

|            | Measurement  | $J_{sc}$<br>(mA/cm <sup>2</sup> ) | $V_{oc}$<br>(V) | FF<br>(%) | PCE<br>(%) | PCE <sub>MPPT</sub><br>(%) |
|------------|--------------|-----------------------------------|-----------------|-----------|------------|----------------------------|
| CEAI-RS    | 2-wire       | 25.1                              | 1.148           | 70.8      | 20.4       | /                          |
| Control-RS | 2-wire       | 24.9                              | 1.055           | 62.1      | 16.3       |                            |
| CEAI-RS    | 4-wire split | 24.9                              | 1.149           | 78.2      | 22.37      | 22.4                       |
| CEAI-FS    | 4-wire split | 25.1                              | 1.137           | 75.6      | 21.54      |                            |
| Control-RS | 4-wire split | 24.6                              | 1.084           | 74.8      | 19.98      | 19.3                       |
| Control-FS | 4-wire split | 24.8                              | 1.074           | 68.4      | 18.21      |                            |

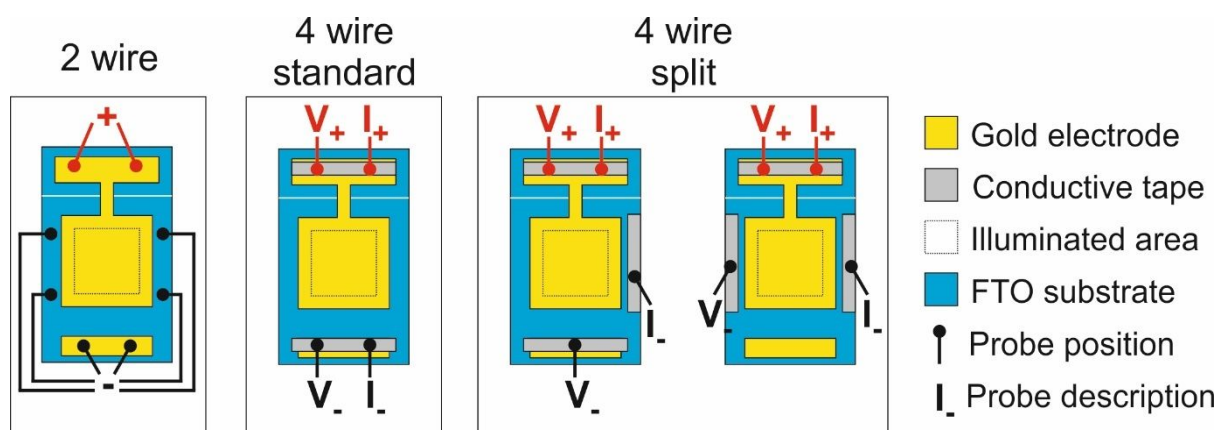

**Figure S8.** Schemes of the connection used to measure the 1 cm<sup>2</sup> devices. In the 2-wire configuration, the  $V_+ / I_+$  and  $V_- / I_-$  are shunted before the connection to the contact probes.

The two configurations of the 4-wire split have been showing the same results.

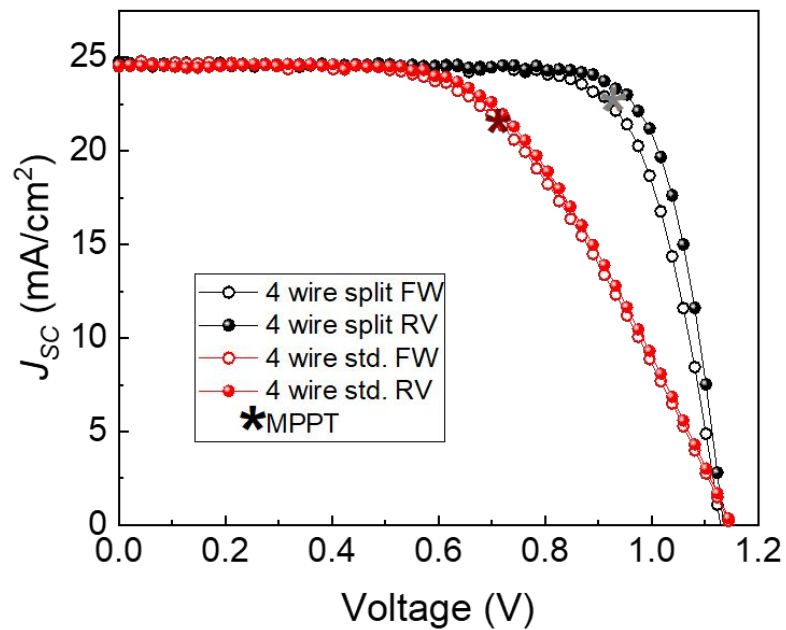

**Figure S9.** Effect of the different 4-wire connection schemes on the JV curves of a  $1 \text{ cm}^2$  cell. The star indicates the value of MPPT after a minute of tracking.

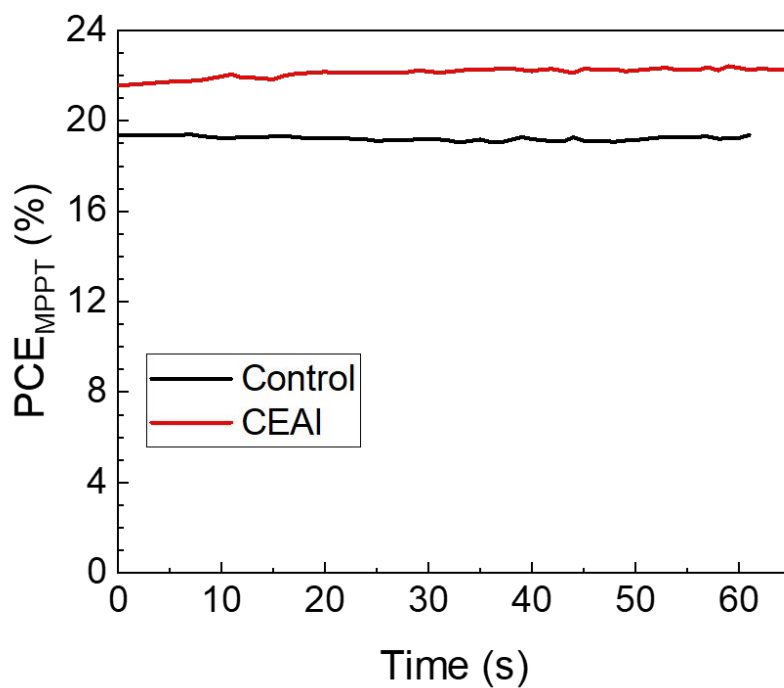

**Figure S10.** Maximum power point tracking (4-wire split method) of the champion  $1 \text{ cm}^2$  cells presented in Figure 4f.

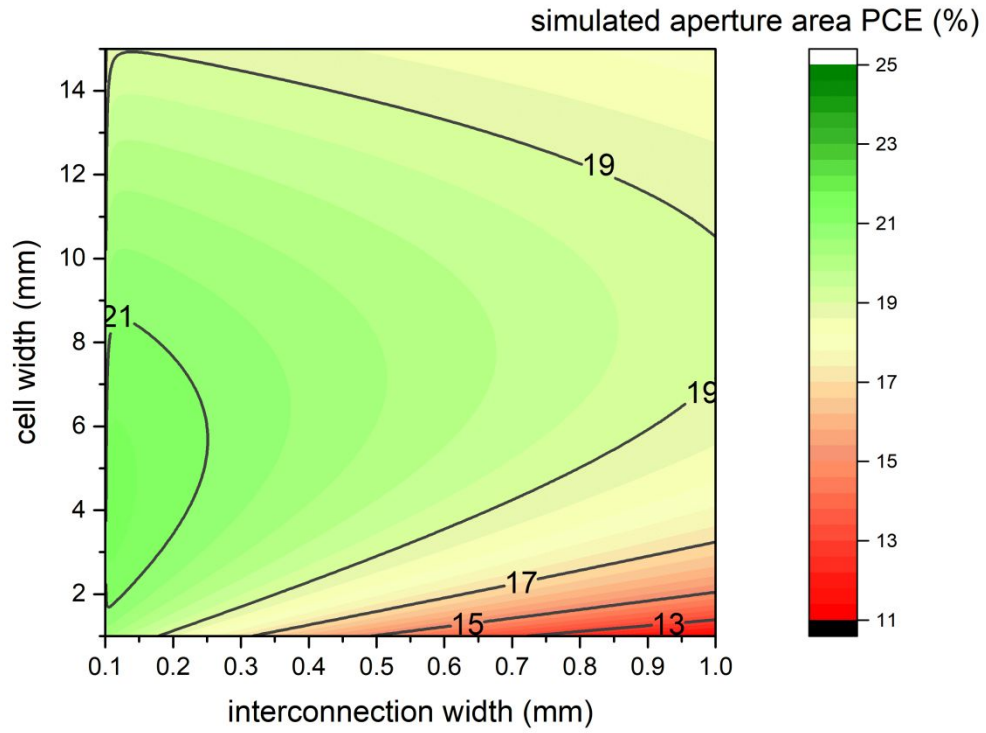

**Figure S11.** Simulated maximum efficiency (on aperture area) using the input of the 4-wire split measurement on  $1 \text{ cm}^2$ . The parameter used for the simulation are: conductivity of bottom electrode of  $8 \text{ } \Omega \text{ sq}^{-1}$ , transfer length of interconnection of 0.06 mm.

## References

- [1] Green, M. A. Accuracy of Analytical Expressions for Solar Cell Fill Factors. *Solar Cells*, **1982**, *7*, 337-340.
- [2] Greulich, J.; Glatthaar, M.; Rein, S. Fill Factor Analysis of Solar Cells' Current–Voltage Curves. *Prog. Photovolt: Res. Appl.* **2010**, *18*, 511-515.
